# Supplementary material for: Impacts of Wetland Plants on Microbial Community and Methane Metabolisms
Source: Research Square preprint supplement (doi:10.21203/rs.3.rs-444280/v1), 2021-04-23
Supplement: Supplementary file 1 [file c0964ef25b073293f50c21bb.docx]

**DNA Extraction From Peat – Neumann Lab**

***May 2016***

***N.B. Waldo***

Use PowerSoil DNA extraction kit according to directions, with the following modifications:

Note: only 2mL screwtop tubes go in the fastprep 24

Step 0: remove 100 uL of bead solution, replace with 100 uL of pH 7-8 phenol chloroform isoamyl alcohol.

Step 4.5: add “alternative lysis method” from page 13

Step 5: Instaed of vortexing use fastprep-24 at 4.0 m/s for 20s

Step 7: replace “supernant” with “aqueous phase”

Step 14: after this step, switch to vacuum manifold step 2. Do not proceed to step 15.

PowerVac Maniford Proceedure modifications:

Step 5: No need to close each port.

Step 7: spin at 10,000 instead of 15,000 x g

Step 8: Use only 50 uL of solution C6
